# Supplementary material
Source: publisher figshare collection journal article supplement (https://gsapubs.figshare.com/ndownloader/files/38843274)
Supplement: Supplementary file 1 [file 38843274]

## Sheet: Q1-Core
50um	512 pixels
Profile 1a	Distance (um)	Al/Si		Profile 1b	Distance (um)	Al/Si
0	0	3.684		0	0	3.553
1	0.0976562	3.307		1	0.0976562	3.721
2	0.195312	3.583		2	0.195312	3.699
3	0.292969	3.832		3	0.292969	3.56
4	0.390625	3.468		4	0.390625	3.734
5	0.488281	3.505		5	0.488281	3.822
6	0.585938	3.719		6	0.585938	3.558
7	0.683594	3.706		7	0.683594	3.576
8	0.78125	3.659		8	0.78125	3.741
9	0.878906	3.571		9	0.878906	3.783
10	0.976562	3.434		10	0.976562	3.731
11	1.07422	3.242		11	1.07422	3.688
12	1.17188	3.509		12	1.17188	3.984
13	1.26953	3.325		13	1.26953	3.823
14	1.36719	3.74		14	1.36719	3.505
15	1.46484	3.405		15	1.46484	3.514
16	1.5625	3.596		16	1.5625	3.634
17	1.66016	3.668		17	1.66016	3.863
18	1.75781	3.773		18	1.75781	3.81
19	1.85547	3.783		19	1.85547	3.848
20	1.95312	3.706		20	1.95312	3.987
21	2.05078	3.593		21	2.05078	3.919
22	2.14844	3.838		22	2.14844	3.893
23	2.24609	3.714		23	2.24609	4.212
24	2.34375	3.711		24	2.34375	4.204
25	2.44141	3.618		25	2.44141	4.296
26	2.53906	3.712		26	2.53906	4.278
27	2.63672	3.769		27	2.63672	4.337
28	2.73438	3.703		28	2.73438	4.23
29	2.83203	3.822		29	2.83203	4.668
30	2.92969	3.771		30	2.92969	4.651
31	3.02734	3.696		31	3.02734	4.306
32	3.125	3.388		32	3.125	4.385
33	3.22266	3.681		33	3.22266	4.444
34	3.32031	3.78		34	3.32031	5.008
35	3.41797	3.813		35	3.41797	4.893
36	3.51562	3.734		36	3.51562	4.595
37	3.61328	3.787		37	3.61328	4.636
38	3.71094	3.936		38	3.71094	5.002
39	3.80859	3.914		39	3.80859	5.157
40	3.90625	4.432		40	3.90625	5.246
41	4.00391	4.276		41	4.00391	5.179
42	4.10156	4.247		42	4.10156	5.398
43	4.19922	4.411		43	4.19922	5.42
44	4.29688	4.253		44	4.29688	5.605
45	4.39453	4.278		45	4.39453	5.787
46	4.49219	4.501		46	4.49219	5.922
47	4.58984	4.548		47	4.58984	6.191
48	4.6875	4.314		48	4.6875	6.098
49	4.78516	4.645		49	4.78516	6.193
50	4.88281	4.7		50	4.88281	6.31
51	4.98047	4.508		51	4.98047	6.318
52	5.07812	4.618		52	5.07812	6.736
53	5.17578	4.745		53	5.17578	6.84
54	5.27344	5.051		54	5.27344	7.509
55	5.37109	4.898		55	5.37109	7.373
56	5.46875	4.878		56	5.46875	7.629
57	5.56641	5.032		57	5.56641	7.957
58	5.66406	5.248		58	5.66406	8.081
59	5.76172	5.456		59	5.76172	8.574
60	5.85938	5.52		60	5.85938	8.619
61	5.95703	5.594		61	5.95703	8.85
62	6.05469	5.715		62	6.05469	8.973
63	6.15234	5.81		63	6.15234	8.889
64	6.25	5.973		64	6.25	9.643
65	6.34766	6.013		65	6.34766	9.626
66	6.44531	6.317		66	6.44531	9.898
67	6.54297	6.246		67	6.54297	9.928
68	6.64062	6.409		68	6.64062	9.909
69	6.73828	6.589		69	6.73828	9.96
70	6.83594	6.934		70	6.83594	9.777
71	6.93359	7.057		71	6.93359	10.371
72	7.03125	7.115		72	7.03125	10.606
73	7.12891	7.773		73	7.12891	10.616
74	7.22656	7.831		74	7.22656	10.401
75	7.32422	8.266		75	7.32422	10.408
76	7.42188	8.452		76	7.42188	11.063
77	7.51953	8.376		77	7.51953	10.805
78	7.61719	8.478		78	7.61719	11.317
79	7.71484	8.735		79	7.71484	11.346
80	7.8125	9.033		80	7.8125	11.259
81	7.91016	9.131		81	7.91016	11.013
82	8.00781	9.56		82	8.00781	11.347
83	8.10547	9.645		83	8.10547	11.497
84	8.20312	10.062		84	8.20312	11.885
85	8.30078	9.68		85	8.30078	11.958
86	8.39844	10.572		86	8.39844	11.926
87	8.49609	10.457		87	8.49609	12.155
88	8.59375	10.018		88	8.59375	11.981
89	8.69141	10.329		89	8.69141	11.659
90	8.78906	10.435		90	8.78906	11.988
91	8.88672	10.772		91	8.88672	11.923
92	8.98438	10.346		92	8.98438	11.784
93	9.08203	10.666		93	9.08203	12.342
94	9.17969	10.78		94	9.17969	12.408
95	9.27734	11.448		95	9.27734	12.42
96	9.375	11.156		96	9.375	12.001
97	9.47266	11.382		97	9.47266	11.879
98	9.57031	11.409		98	9.57031	12.165
99	9.66797	10.999		99	9.66797	12.073
100	9.76562	11.163		100	9.76562	12.145
101	9.86328	11.865		101	9.86328	11.963
102	9.96094	11.824		102	9.96094	12.057
103	10.0586	11.98		103	10.0586	12.094
104	10.1562	11.886		104	10.1562	12.201
105	10.2539	12.128		105	10.2539	11.848
106	10.3516	11.811		106	10.3516	12.352
107	10.4492	11.592		107	10.4492	11.978
108	10.5469	11.955		108	10.5469	11.893
109	10.6445	11.991		109	10.6445	12.23
110	10.7422	12.376		110	10.7422	12.026
111	10.8398	12.053		111	10.8398	12.207
112	10.9375	12.45		112	10.9375	11.802
113	11.0352	11.979		113	11.0352	12.043
114	11.1328	11.624
115	11.2305	12.347
116	11.3281	12.184
117	11.4258	12.287
118	11.5234	12.277
119	11.6211	11.794
120	11.7188	11.861
121	11.8164	12.133
122	11.9141	12.246
123	12.0117	11.789
124	12.1094	11.925
125	12.207	11.994
126	12.3047	12.386
127	12.4023	11.855
128	12.5	12.136
129	12.5977	11.894
130	12.6953	12.071
131	12.793	12.258
132	12.8906	12.252
133	12.9883	12.093
134	13.0859	12.05
135	13.1836	12.259
136	13.2812	11.916
137	13.3789	12.009
138	13.4766	11.86
139	13.5742	11.94
140	13.6719	12.292
141	13.7695	12.271
142	13.8672	11.775
143	13.9648	12.02

## Sheet: Q1-mantle
20um	512 pixels
Profile 1a	Distance (um)	Al/Si		Profile 1b	Distance (um)	Al/Si		Profile 2a	Distance (um)	Al/Si		Profile 2b	Distance (um)	Al/Si
0	0	5.178		0	0	6.024		68	2.65625	7.028		0	0	8.085
1	0.0390625	5.598		1	0.0390625	5.766		69	2.69531	6.872		1	0.0390625	8.1
2	0.078125	5.471		2	0.078125	5.923		70	2.73438	6.897		2	0.078125	8.393
3	0.117188	5.86		3	0.117188	5.414		71	2.77344	6.926		3	0.117188	8.644
4	0.15625	5.698		4	0.15625	5.672		72	2.8125	7.147		4	0.15625	8.597
5	0.195312	5.666		5	0.195312	5.897		73	2.85156	6.814		5	0.195312	8.701
6	0.234375	5.418		6	0.234375	5.793		74	2.89062	6.54		6	0.234375	8.553
7	0.273438	5.503		7	0.273438	5.585		75	2.92969	6.604		7	0.273438	8.854
8	0.3125	5.61		8	0.3125	5.405		76	2.96875	7.082		8	0.3125	8.103
9	0.351562	5.692		9	0.351562	5.462		77	3.00781	7.117		9	0.351562	8.109
10	0.390625	5.308		10	0.390625	5.466		78	3.04688	6.805		10	0.390625	8.549
11	0.429688	5.382		11	0.429688	5.293		79	3.08594	6.869		11	0.429688	8.647
12	0.46875	5.348		12	0.46875	5.764		80	3.125	6.975		12	0.46875	8.795
13	0.507812	5.278		13	0.507812	5.671		81	3.16406	6.721		13	0.507812	8.469
14	0.546875	5.354		14	0.546875	5.709		82	3.20312	6.718		14	0.546875	8.488
15	0.585938	5.234		15	0.585938	5.54		83	3.24219	6.825		15	0.585938	8.272
16	0.625	5.505		16	0.625	5.288		84	3.28125	6.69		16	0.625	8.201
17	0.664062	5.373		17	0.664062	5.675		85	3.32031	6.668		17	0.664062	8.226
18	0.703125	5.298		18	0.703125	5.627		86	3.35938	6.906		18	0.703125	8.22
19	0.742188	5.658		19	0.742188	5.31		87	3.39844	6.61		19	0.742188	7.755
20	0.78125	5.476		20	0.78125	5.691		88	3.4375	6.461		20	0.78125	8.036
21	0.820312	5.205		21	0.820312	5.45		89	3.47656	6.358		21	0.820312	7.859
22	0.859375	5.37		22	0.859375	5.452		90	3.51562	6.184		22	0.859375	7.714
23	0.898438	4.909		23	0.898438	5.572		91	3.55469	5.953		23	0.898438	7.505
24	0.9375	5.093		24	0.9375	5.468		92	3.59375	5.858		24	0.9375	7.719
25	0.976562	5.655		25	0.976562	5.349		93	3.63281	6.062		25	0.976562	7.419
26	1.01562	5.376		26	1.01562	5.295		94	3.67188	6.044		26	1.01562	7.319
27	1.05469	5.247		27	1.05469	5.416		95	3.71094	5.88		27	1.05469	7.3
28	1.09375	5.112		28	1.09375	5.09		96	3.75	5.635		28	1.09375	7.173
29	1.13281	5.065		29	1.13281	5.132		97	3.78906	5.684		29	1.13281	7.537
30	1.17188	4.903		30	1.17188	4.994		98	3.82812	5.561		30	1.17188	7.396
31	1.21094	5.116		31	1.21094	4.835		99	3.86719	5.076		31	1.21094	6.695
32	1.25	5.153		32	1.25	4.989		100	3.90625	5.291		32	1.25	6.757
33	1.28906	4.935		33	1.28906	4.642		101	3.94531	5.11		33	1.28906	6.93
34	1.32812	4.867		34	1.32812	4.445		102	3.98438	5.038		34	1.32812	6.472
35	1.36719	4.568		35	1.36719	4.397		103	4.02344	4.878		35	1.36719	6.245
36	1.40625	4.677		36	1.40625	4.292		104	4.0625	4.964		36	1.40625	5.991
37	1.44531	4.579		37	1.44531	4.122		105	4.10156	5.116		37	1.44531	6.112
38	1.48438	3.926		38	1.48438	4.144		106	4.14062	4.665		38	1.48438	5.799
39	1.52344	4.012		39	1.52344	3.965		107	4.17969	4.679		39	1.52344	5.767
40	1.5625	4.101		40	1.5625	4.121		108	4.21875	4.47		40	1.5625	6.112
41	1.60156	4.145		41	1.60156	3.953		109	4.25781	4.464		41	1.60156	6.12
42	1.64062	3.721		42	1.64062	3.569		110	4.29688	4.221		42	1.64062	5.571
43	1.67969	4.036		43	1.67969	3.584		111	4.33594	4.808		43	1.67969	5.434
44	1.71875	3.863		44	1.71875	3.786		112	4.375	4.269		44	1.71875	5.432
45	1.75781	3.793		45	1.75781	3.875		113	4.41406	4.301		45	1.75781	5.366
46	1.79688	3.642		46	1.79688	3.808		114	4.45312	4.504		46	1.79688	5.519
47	1.83594	3.485		47	1.83594	3.588		115	4.49219	4.233		47	1.83594	5.259
48	1.875	3.538		48	1.875	3.863		116	4.53125	4.211		48	1.875	5.166
49	1.91406	3.712		49	1.91406	3.734		117	4.57031	4.213		49	1.91406	5.255
50	1.95312	3.888		50	1.95312	3.879		118	4.60938	4.107		50	1.95312	4.969
51	1.99219	3.562		51	1.99219	3.941		119	4.64844	4.221		51	1.99219	5.111
52	2.03125	3.467		52	2.03125	3.617		120	4.6875	4.285		52	2.03125	4.812
53	2.07031	3.721		53	2.07031	3.749		121	4.72656	4.206		53	2.07031	4.977
54	2.10938	3.752		54	2.10938	3.954		122	4.76562	4.113		54	2.10938	5.196
55	2.14844	3.934		55	2.14844	3.618		123	4.80469	4.195		55	2.14844	5.131
56	2.1875	3.489		56	2.1875	3.603		124	4.84375	4.358		56	2.1875	4.868
57	2.22656	3.546		57	2.22656	3.621		125	4.88281	4.587		57	2.22656	5.211
58	2.26562	3.628		58	2.26562	3.8		126	4.92188	4.315		58	2.26562	4.916
59	2.30469	3.769						127	4.96094	4.529		59	2.30469	5.06
60	2.34375	3.658						128	5	4.41		60	2.34375	4.894
61	2.38281	3.367						129	5.03906	4.59		61	2.38281	5.192
62	2.42188	3.573						130	5.07812	4.267		62	2.42188	5.356
63	2.46094	3.687						132	5.15625	4.485		63	2.46094	5.084
64	2.5	3.874										64	2.5	5.313
65	2.53906	3.972
66	2.57812	4.071
67	2.61719	3.791
68	2.65625	3.868
69	2.69531	3.9
70	2.73438	3.875
71	2.77344	4.18
72	2.8125	4.008

## Sheet: Q1-rim
50um	512 pixels
Profile 1a	Distance (um)	Al/Si		Profile 1b	Distance (um)	Al/Si		Profile 1c	Distance (um)	Al/Si
2	0.195312	4.216		0	0	4.164		0	0	4.167
3	0.292969	4.133		1	0.0976562	3.909		1	0.0976562	4.043
4	0.390625	4.045		2	0.195312	3.598		2	0.195312	3.844
5	0.488281	4.467		3	0.292969	3.9		3	0.292969	4.097
6	0.585938	5.098		4	0.390625	4.203		4	0.390625	4.343
7	0.683594	6.014		5	0.488281	4.869		5	0.488281	4.951
8	0.78125	6.814		6	0.585938	5.557		6	0.585938	5.683
9	0.878906	7.437		7	0.683594	5.947		7	0.683594	6.168
10	0.976562	7.661		8	0.78125	6.528		8	0.78125	6.504
11	1.07422	7.56		9	0.878906	6.45		9	0.878906	6.628
12	1.17188	7.73		10	0.976562	6.608		10	0.976562	6.805
13	1.26953	6.975		11	1.07422	6.227		11	1.07422	6.301
14	1.36719	6.088		12	1.17188	5.777		12	1.17188	5.909
15	1.46484	5.229		13	1.26953	5.25		13	1.26953	5.395
16	1.5625	4.464		14	1.36719	4.304		14	1.36719	4.579
17	1.66016	4.378		15	1.46484	4.014		15	1.46484	4.286
18	1.75781	4.114		16	1.5625	3.754		16	1.5625	4.07
19	1.85547	4.186		17	1.66016	3.575		17	1.66016	3.82
20	1.95312	4.118		18	1.75781	3.467		18	1.75781	3.689
21	2.05078	4.213		19	1.85547	3.701		19	1.85547	3.775
22	2.14844	4.17		20	1.95312	3.699		20	1.95312	3.697
				21	2.05078	3.644		21	2.05078	3.58
				22	2.14844	3.386		22	2.14844	3.559

## Sheet: Summary
						Tailby, 2018				Jollands et al., 2020
Stage	Profile	log10[Dt]	2σ	Temperature (℃)		Timescale (kyr)	+2σ	-2σ		Timescale (Myr)	+2σ	-2σ
Q1-Core	profile 1a	-11.827	0.036	505	isothermal	47	23	-15		2995	2475	-1355
Q1-Core	profile 1b	-11.8394	0.039	505	isothermal	45	22	15		2911	2410	-1319
Q1-mantle	profile 1a	-13.9319	0.2589	505-405	cooling	1.5	1.6	-0.8		146	197	-84
Q1-mantle	profile 1b	-13.7938	0.1911	505-405	cooling	2.1	1.8	-1		202	229	-107
Q1-mantle	profile 2a	-13.2991	0.1349	505-405	cooling	6.6	4.5	-2.7		631	599	307
Q1-mantle	profile 2b	-13.1236	0.1345	505-405	cooling	9.9	6.6	-4		926	913	-460
Q1-rim	profile 1a	-14.0067	0.1151	375	isothermal	137	118	-63		218978	319515	-129931
Q1-rim	profile 1b	-13.9365	0.2276	375	isothermal	161	186	-86		257395	447194	-163366
Q1-rim	profile 1c	-13.7723	0.2181	375	isothermal	235	264	-124		375665	641212	-236883

## Sheet: G50781
Li, Y., et al., 2023, Transient tin mineralization from cooling of magmatic fluids in a long-lived system: Geology, https://doi.org/10.1130/G50781.1
